# Supplementary material for: Synthesis, structural characterization, VHPO mimicking peroxidative bromination and DNA nuclease activity of oxovanadium(v) complexes
Source: Royal Society of Chemistry journal article supplement (doi:10.1039/c3dt51291f), 2013-01-01
Supplement: c3dt51291f.pdf [file c3dt51291f.pdf]

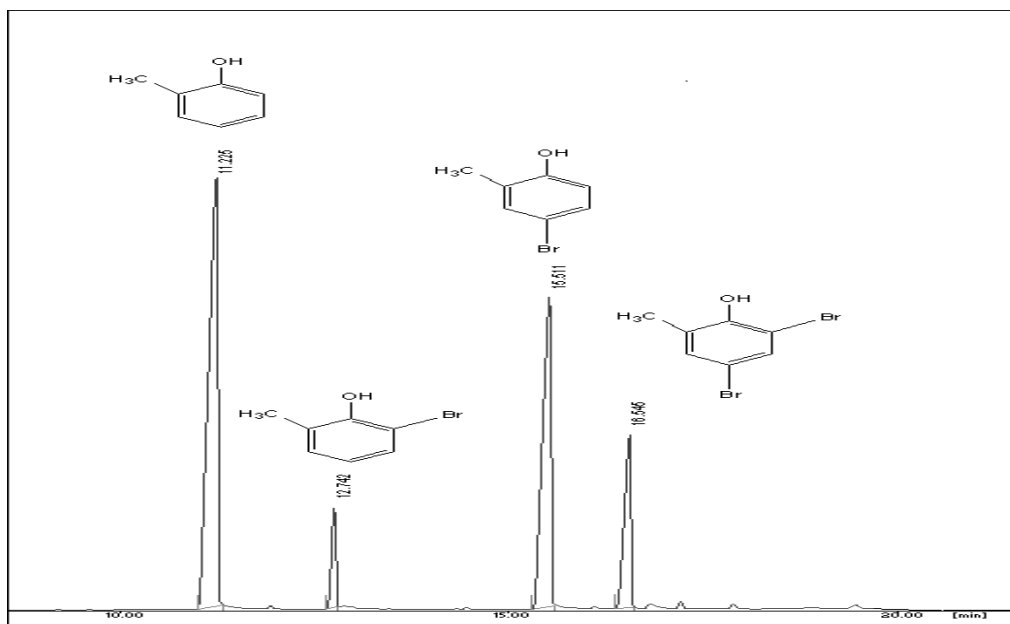

**Fig.S1: Retention time of the corresponding brominated products including the substrate o-cresol in the gas chromatogram with catalyst 1. (Done in Agilent 6890N GC System)**

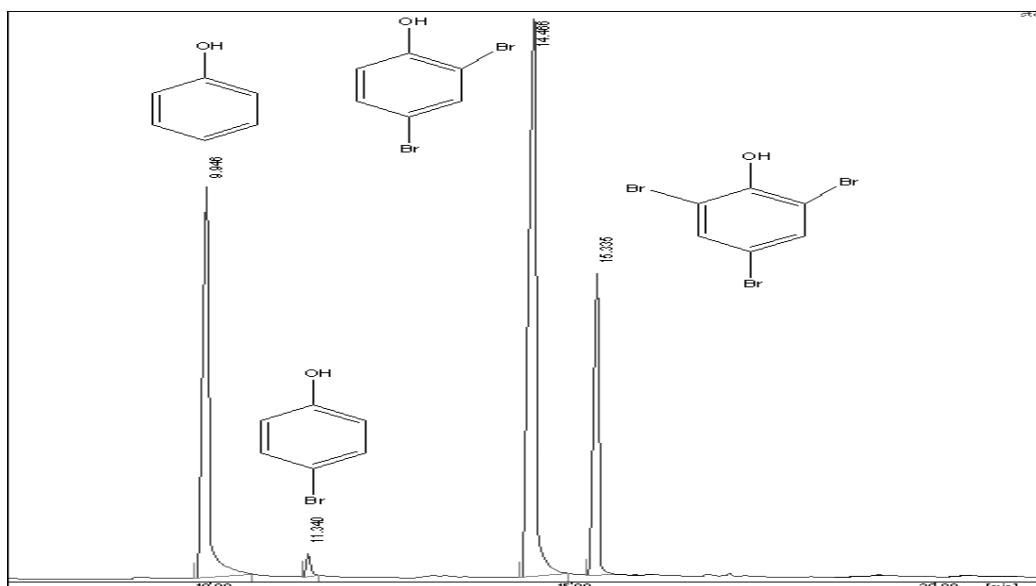

**Fig.S2: Retention time of the corresponding brominated products including the substrate phenol in the gas chromatogram with catalyst 1. (Done in Agilent 6890N GC System)**

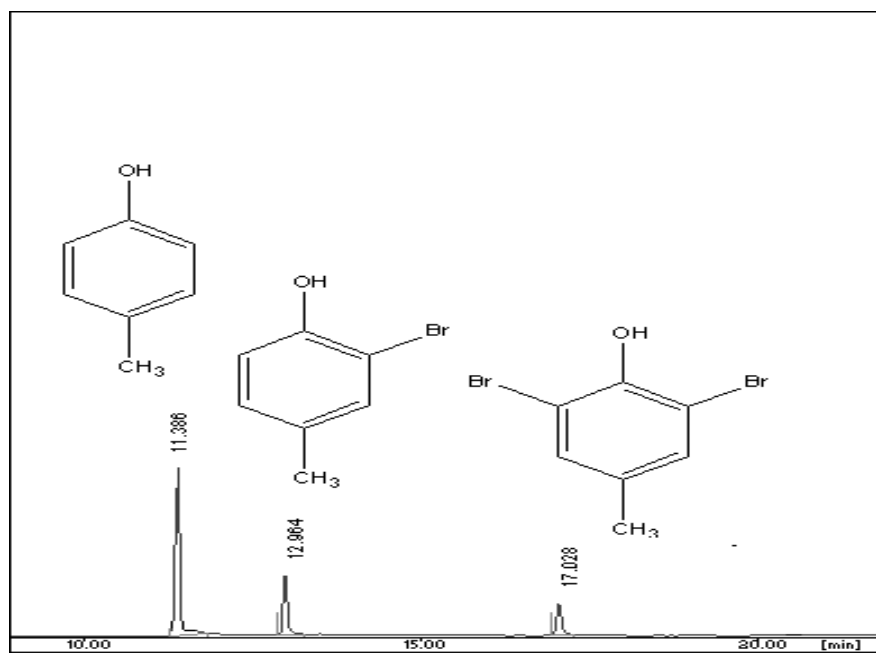

**Fig.S3: Retention time of the corresponding brominated products including the substrate p-cresol in the gas chromatogram with catalyst 1. (Done in Agilent 6890N GC System)**

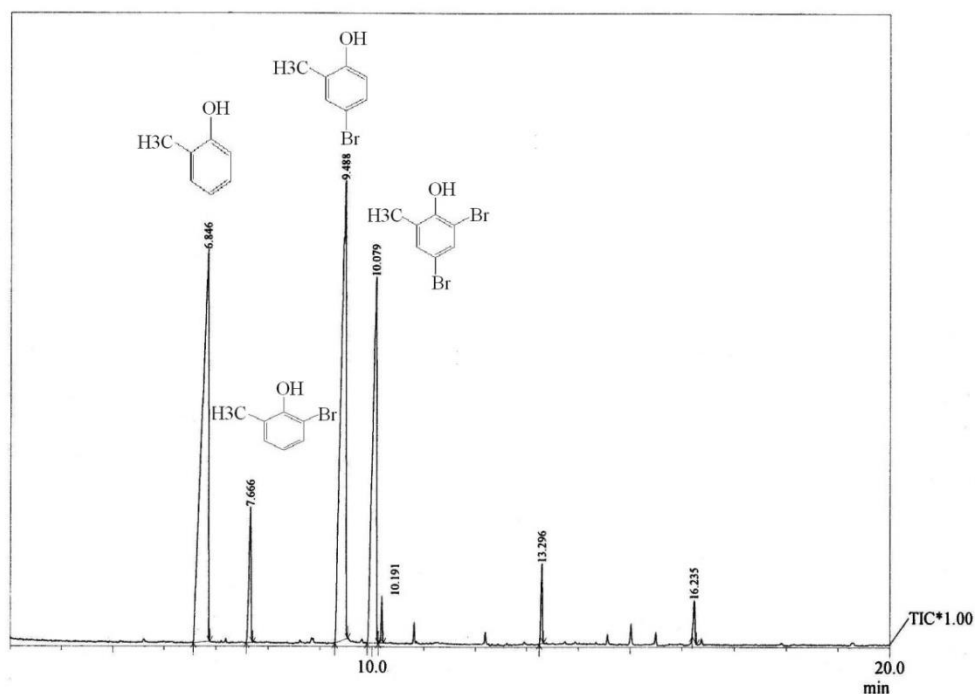

**Fig.S4: Retention time of the corresponding brominated products including the substrate o-cresol in the gas chromatogram with catalyst 2. (Done in SHIMADZU-QP-5050A GC-MS)**

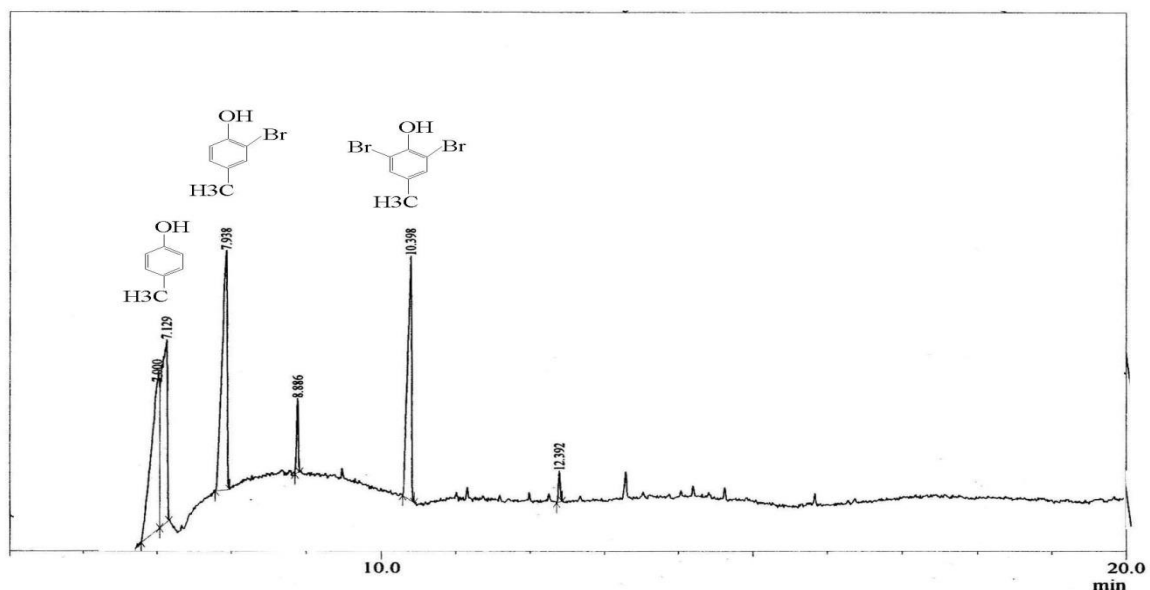

**Fig.S5: Retention time of the corresponding brominated products including the substrate p-cresol in the gas chromatogram with catalyst 2. (Done in SHIMADZU-QP-5050A GC-MS)**

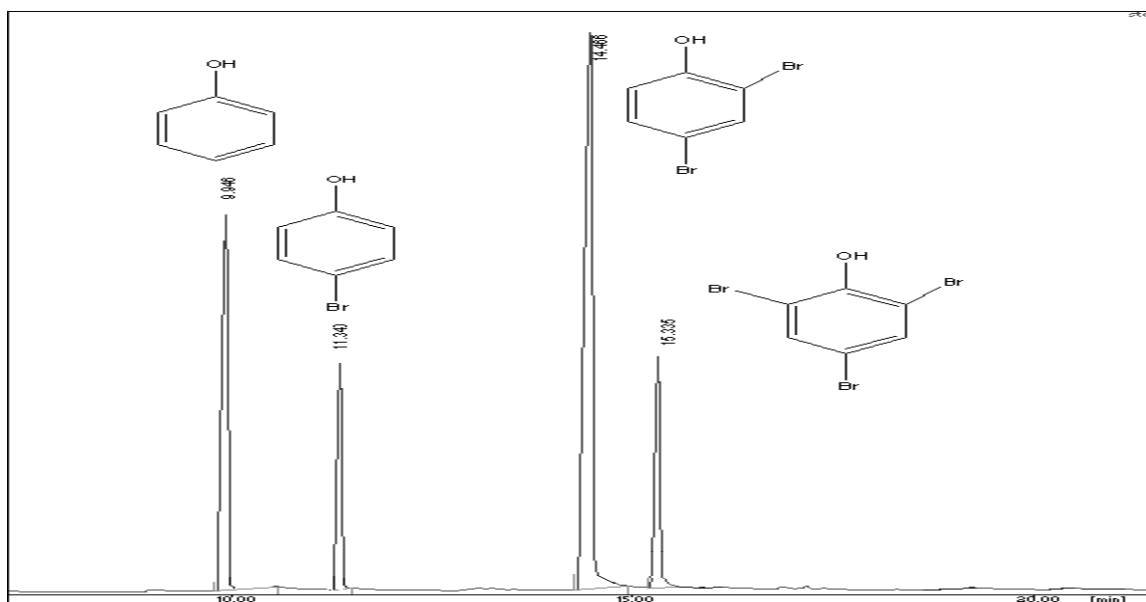

**Fig.S6: Retention time of the corresponding brominated products including the substrate phenol in the gas chromatogram with catalyst 2. (Done in Agilent 6890N GC System)**

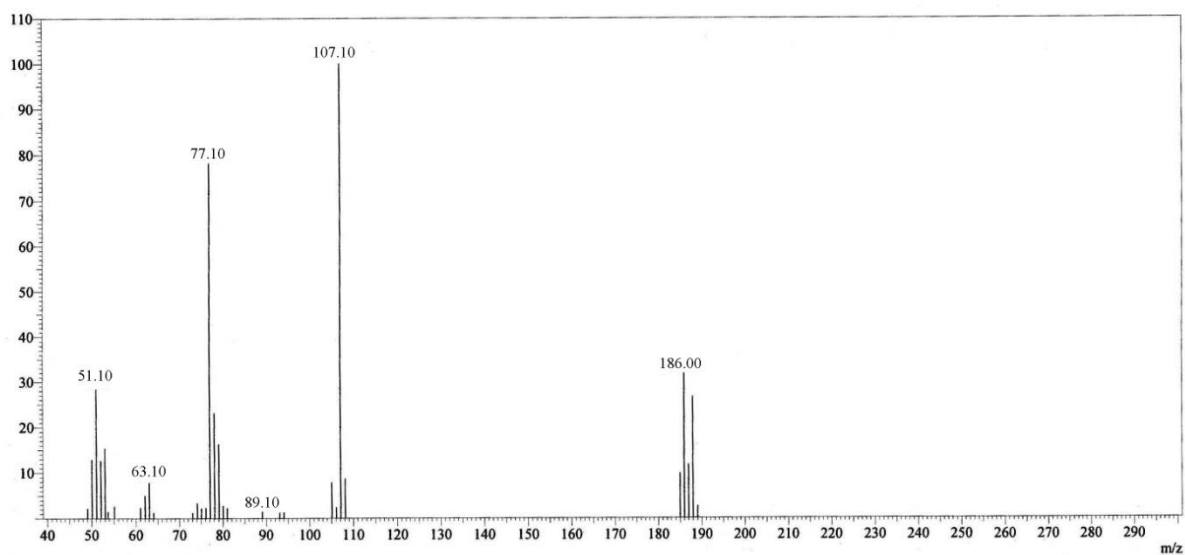

**Fig.S7: Mass spectram of 2-bromo para-cresol**

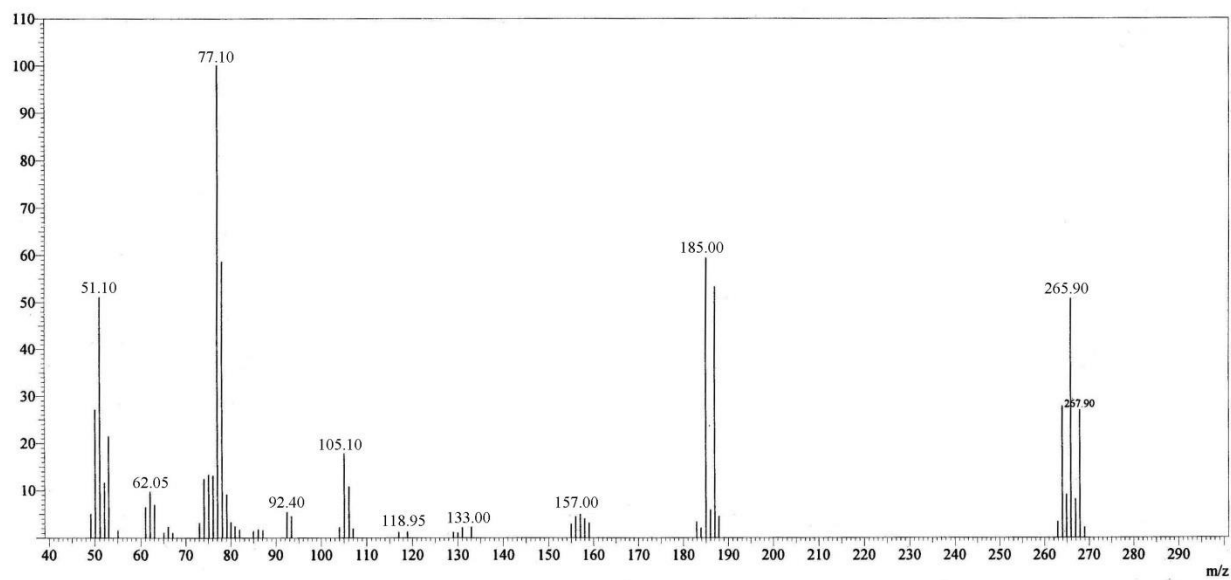

**Fig.S8: Mass spectram of 2,6- dibromo para-cresol**

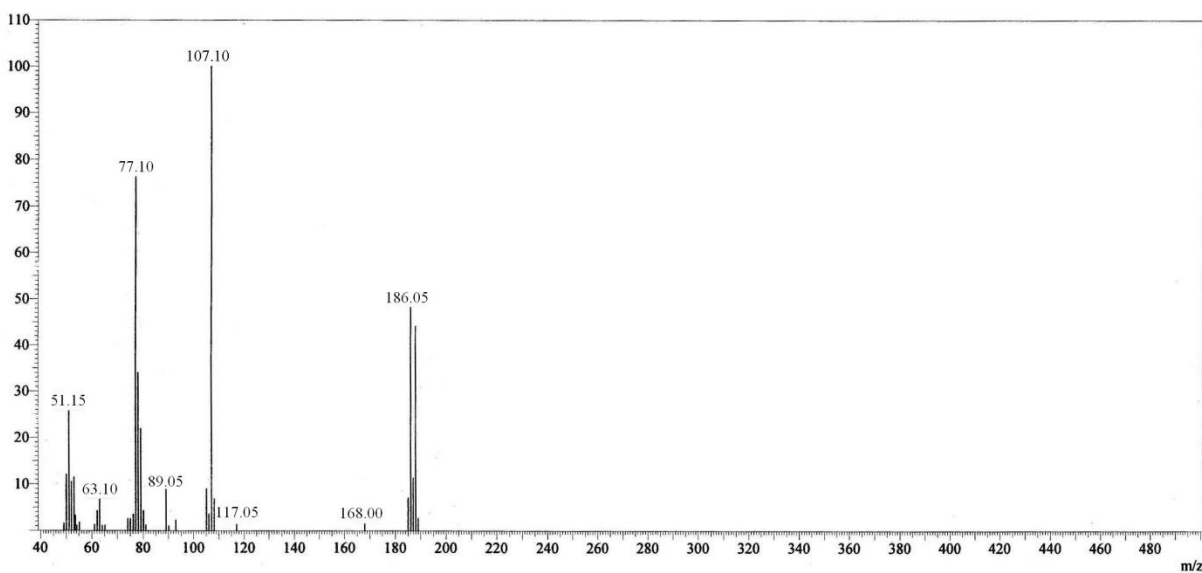

**Fig.S9: Mass spectram of 2- bromo ortho-cresol**

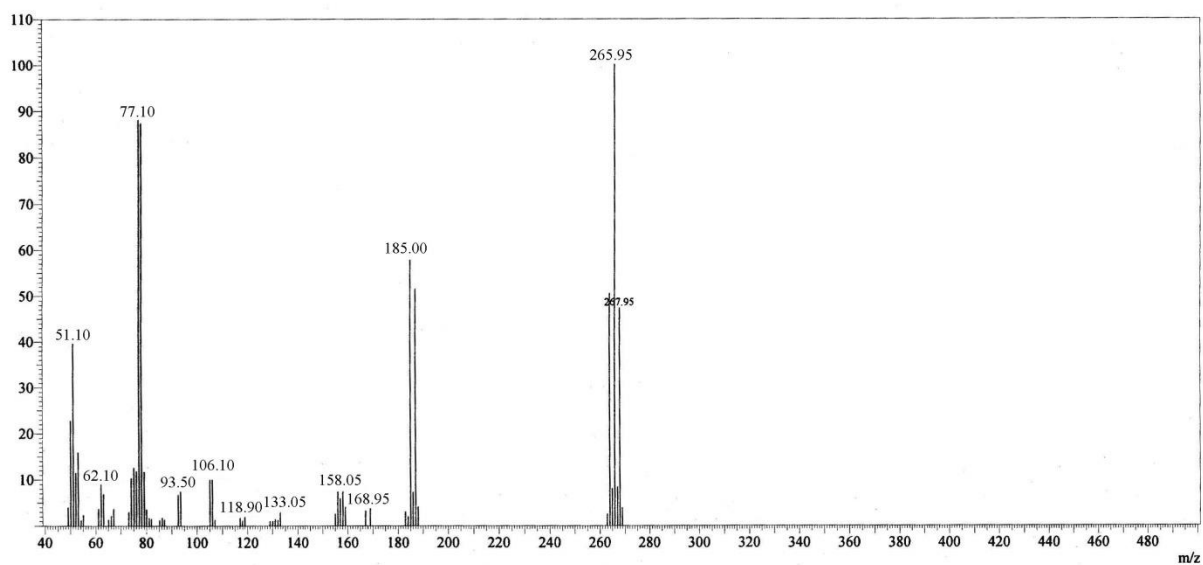

**Fig.S10: Mass spectram of 2,4 -dibromo ortho-cresol**

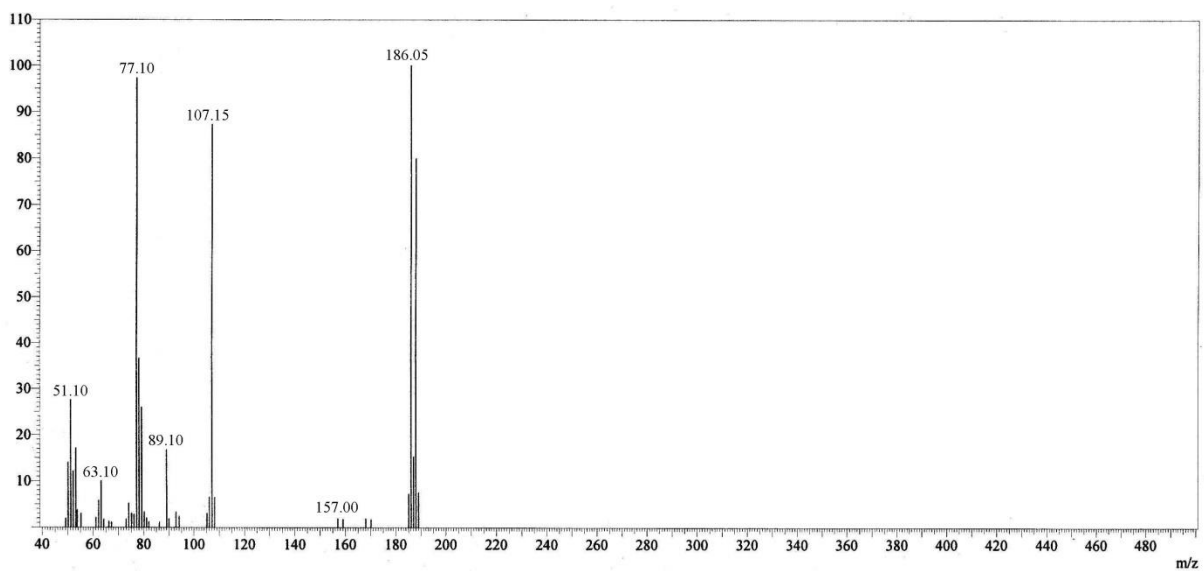

**Fig.S11: Mass spectram of 4- bromo ortho-cresol**

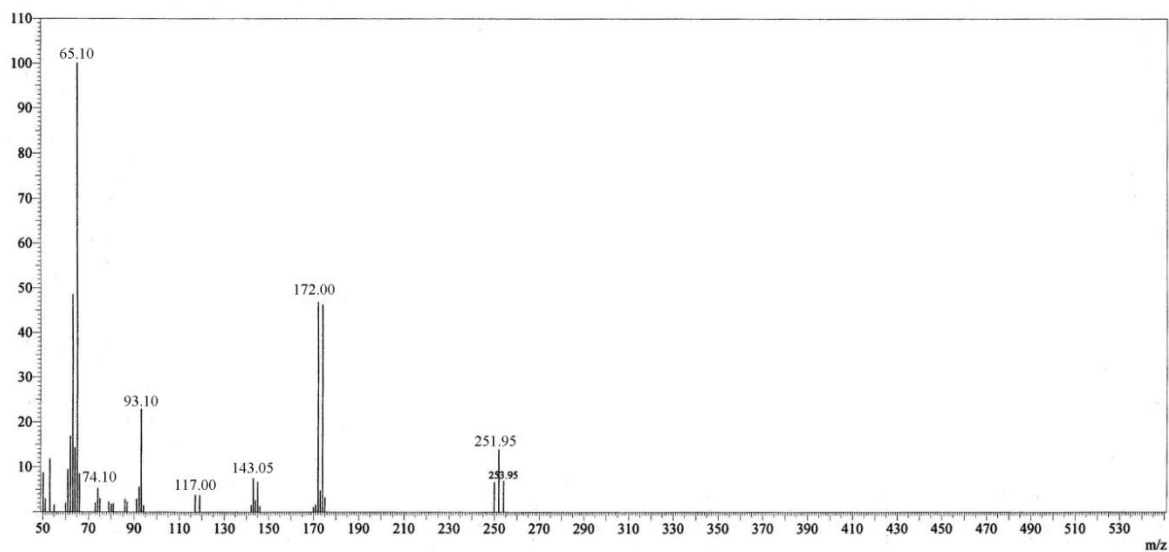

**Fig.S12: Mass spectram of 4- bromo phenol**

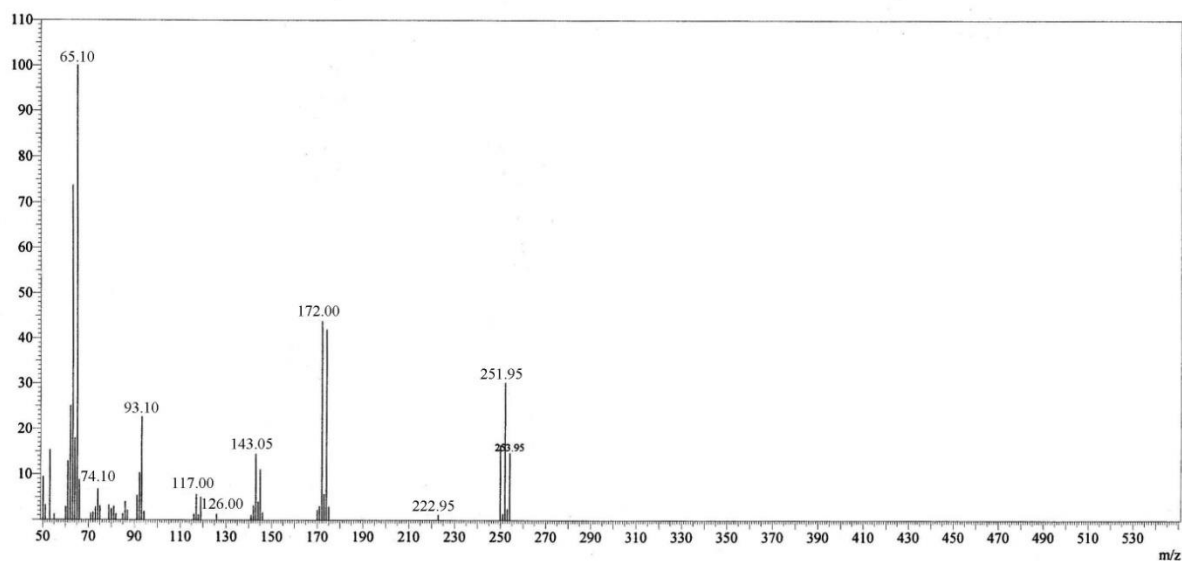

**Fig.S13: Mass spectram of 2,4 -dibromophenol**

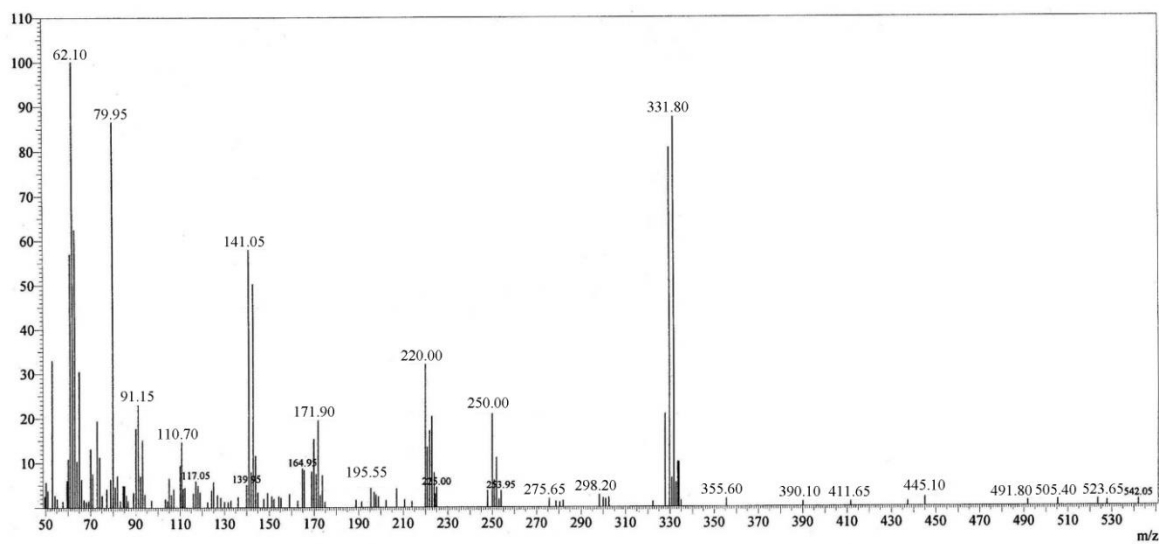

**Fig.S14: Mass spectram of 2,4,6-tribromophenol**

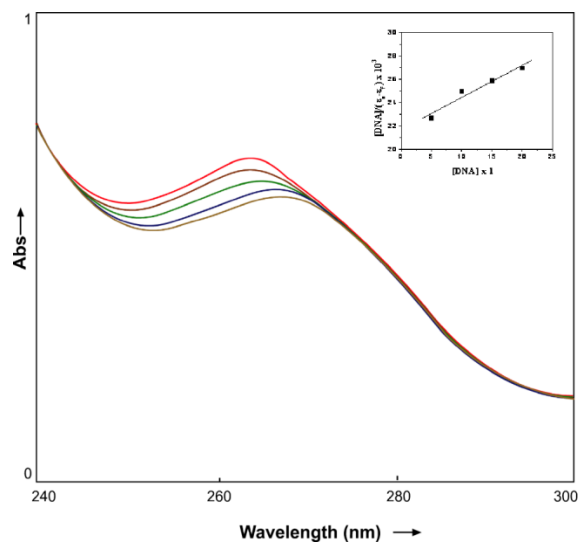

**Fig. S15:** Absorption spectra of the complex 1 in the presence of increasing amounts of CT DNA. A fixed concentration of complex ( $10^{-4} \text{ M}$ ) was treated with increasing amounts of DNA over a range of  $(0.2\text{--}1.0) \times 10^{-4} \text{ M}$ . Inset: plot of  $[DNA]/(\epsilon_a - \epsilon_f) \times 10^3 \text{ M/M}^{-1} \text{ cm}^{-1}$  vs.  $[DNA] \times 1.0 \text{ M}$ .

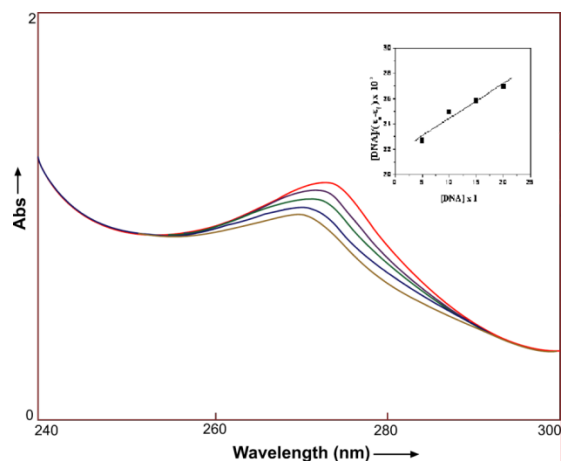

**Fig. S16:** Absorption spectra of the complex 2 in the presence of increasing amounts of CT DNA. A fixed concentration of complex ( $10^{-4} \text{ M}$ ) was treated with increasing amounts of DNA over a range of  $(0.2\text{--}1.0) \times 10^{-4} \text{ M}$ . Inset: plot of  $[DNA]/(\epsilon_a - \epsilon_f) \times 10^3 \text{ M/M}^{-1} \text{ cm}^{-1}$  vs.  $[DNA] \times 1.0 \text{ M}$ .

| <b>D-H...A</b>                   | <b>d(D-H)</b> | <b>d(H...A)</b> | <b>d(D...A)</b> | <b>∠(DHA)</b> |
|----------------------------------|---------------|-----------------|-----------------|---------------|
| N1 -- H1 .. O2 <sup>(i)</sup>    | 0.75(2)       | 2.10(2)         | 2.840(2)        | 170(2)        |
| C3 -- H3 .. O7                   | 0.94(2)       | 2.48(3)         | 2.830(2)        | 102.1(19)     |
| C7 -- H7 .. O2 <sup>(iv)</sup>   | 1.00(2)       | 2.54(2)         | 3.473(2)        | 155.0(17)     |
| C11 - H11 .. O5 <sup>(iii)</sup> | 0.95(2)       | 2.57(2)         | 3.227(3)        | 126.6(17)     |

Symmetry Codes: (i)  $x, 1-y, -1/2+z$  (ii)  $x, 2-y, 1/2+z$

**Table S1: Hydrogen Bonds (Angstrom, Deg) for 1.**

| <b>D-H...A</b>                  | <b>d(D-H)</b> | <b>d(H...A)</b> | <b>d(D...A)</b> | <b>∠(DHA)</b> |
|---------------------------------|---------------|-----------------|-----------------|---------------|
| C3 -- H3 .. O4 <sup>(iii)</sup> | 0.93(3)       | 2.51(3)         | 3.331(3)        | 148(3)        |
| C11 -- H11.. O2 <sup>(iv)</sup> | 0.93(3)       | 2.53(2)         | 3.329(3)        | 144(19)       |
| C18 -- H18 .. O5 <sup>(v)</sup> | 0.93(3)       | 2.39(3)         | 3.316(3)        | 172(2)        |

Symmetry Codes: (iii)  $3/2-x, 1/2+y, 1/2-z$  (iv)  $x, -1+y, z$  (v)  $-x, 2-y, -z$

**Table S2: Hydrogen Bonds (Angstrom, Deg) for 2.**

| [VO(PyDC)(BHA)] (1)    |            | [VO(PyDC)(BPHA)] (2) |            |
|------------------------|------------|----------------------|------------|
| <b>Bond Distances:</b> |            |                      |            |
| V(1) – O(6)            | 1.8497(12) | V(1) – O(6)          | 1.8634(13) |
| V(1) - O(3)            | 1.9411(14) | V(1) – O(3)          | 1.9320(14) |
| V(1) - O(4)            | 1.9693(14) | V(1) – O(4)          | 1.9557(14) |
| <b>Bond Angles:</b>    |            |                      |            |
| O(1) – V(1) – O(3)     | 98.48(7)   | O(1) - V(1) - O(3)   | 99.19(8)   |
| O(3) – V(1) – O(6)     | 103.49(6)  | O(3) - V(1) - O(6)   | 93.33(6)   |
| O(3) – V(1) – O(4)     | 149.99(6)  | O(3) - V(1) - O(4)   | 150.86(7)  |
| O(3) – V(1) – N(2)     | 75.96(6)   | O(3) - V(1) - N(2)   | 75.71(6)   |
| O(3) – V(1) – O(7)     | 85.27(6)   | O(3) - V(1) - O(7)   | 91.00(6)   |
| O(4) – V(1) – O(6)     | 101.07(6)  | O(4) - V(1) - O(6)   | 111.57(6)  |
| O(4) – V(1) – N(2)     | 75.47(5)   | O(4) - V(1) - N(2)   | 75.59(7)   |
| O(4) – V(1) – O(7)     | 84.34(5)   | O(4) - V(1) - O(7)   | 81.34(6)   |
| O(6) – V(1) – O(7)     | 75.68(5)   | O(6) - V(1) - O(7)   | 75.48(6)   |
| O(6) – V(1) – N(2)     | 162.76(6)  | O(6) - V(1) - N(2)   | 156.99(7)  |
| O(7) – V(1) – N(2)     | 87.13(5)   | O(7) - V(1) - N(2)   | 84.41(6)   |

**Table S3: Bond Distances (Å) and Bond Angles (°) of Complex 1 and 2.**
